# Supplementary material
Source: PubMed Central journal article supplement (PMC7012663)
Supplement: NIHMS1534037-supplement-Supp_1.pdf [file NIHMS1534037-supplement-Supp_1.pdf]

Supplementary materials for

Network analyses of psychopathology in cross-section:

Why network psychometrics cannot escape psychometric theory

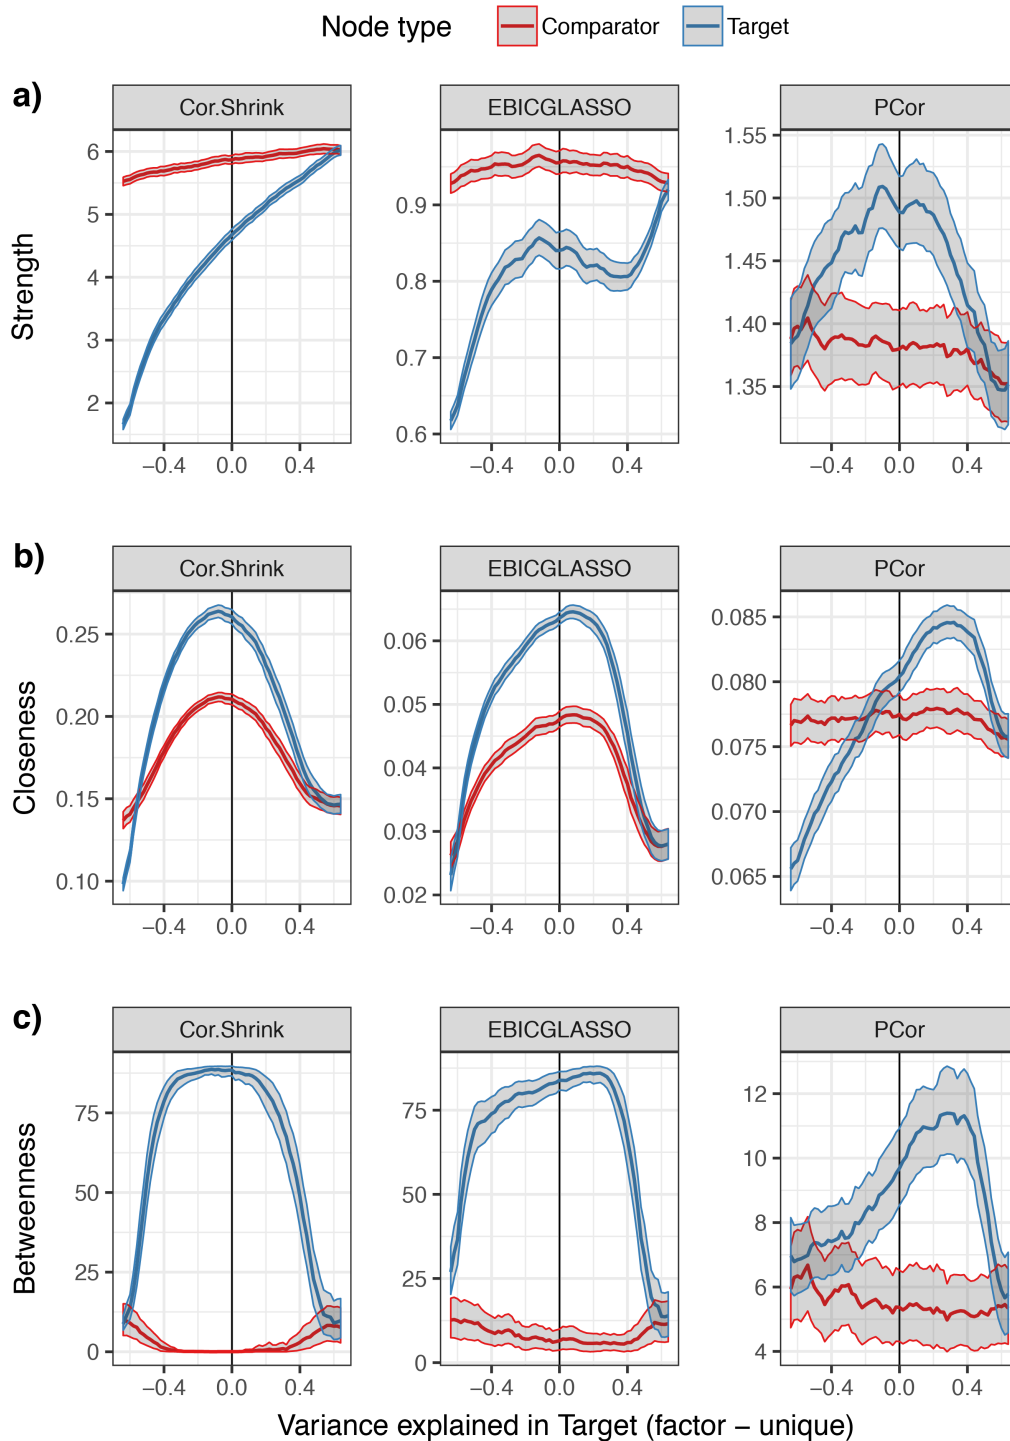

Figure S1. Nodal graph metrics as a function of variance explained in the target nodes,  $y_2$  and  $y_{12}$ , by common factor or unique sources (cf. Figure 7). Here, we include the effect of the simulation on graph metrics when the graph was constructed from *marginal* correlations. More specifically, the *Cor.Shrink* panel depicts graph metrics when edge weights reflected a shrinkage estimate of the zero-order correlation among items (*cor.shrink* function from the *corpcor* package; Schäfer & Strimmer, 2005).

The x axis represents difference in the variance explained by these sources, with the far left-hand side denoting variation completely due to a bivariate relationship between

$y_2$  and  $y_{12}$  (no factor effect). The far right-hand side denotes a condition in which all variation is due to common latent factors (no unique residual association). Lines denote the mean across replications within a condition; ribbons denote the 99% bootstrapped confidence limits of the mean. The *target* node depicts the effects of the simulation conditions on  $y_2$ , whereas the *comparator* node depicts effects on  $y_3$ , whose variance was not manipulated by the simulation.

*Supplementary Table 1.* The effect of factor loadings on closeness for target and comparator nodes in Simulation 3

| Outcome                      | Predictor                    | <i>b</i>  | <i>b</i>           |            | $\beta$ |
|------------------------------|------------------------------|-----------|--------------------|------------|---------|
|                              |                              |           | 95% CI<br>[LL, UL] |            |         |
| Target (y17) Closeness       | Intercept                    | 0.08**    | [0.08, 0.08]       |            |         |
|                              | Target Factor 1 loading (f1) | 0.04**    | [0.04, 0.04]       |            | 0.66    |
|                              | Target Factor 2 loading (f2) | 0.04**    | [0.04, 0.04]       |            | 0.66    |
|                              | f1 <sup>2</sup>              | -0.05**   | [-0.06, -0.05]     |            | -0.15   |
|                              | f2 <sup>2</sup>              | -0.05**   | [-0.06, -0.05]     |            | -0.16   |
|                              | f1 x f2                      | .08**     | [.07, .08]         |            | .26     |
|                              | Comparator (y10) Closeness   | Intercept | .06**              | [.06, .06] |         |
| Target Factor 1 loading (f1) |                              | 0.02**    | [0.02, 0.02]       |            | 0.64    |
| Target Factor 2 loading (f2) |                              | 0.02**    | [0.02, 0.02]       |            | 0.67    |
| f1 <sup>2</sup>              |                              | -0.03**   | [-0.04, -0.03]     |            | -0.16   |
| f2 <sup>2</sup>              |                              | -0.04**   | [-0.05, -0.04]     |            | -0.21   |
| f1 x f2                      |                              | .04**     | [.04, .05]         |            | .23     |

*Note.* *b* represents unstandardized regression weights.  $\beta$  indicates the standardized regression weights. *LL* and *UL* indicate the lower and upper limits of a confidence interval, respectively. \*\* indicates  $p < .01$ .

*Supplementary Table 2.* The effect of factor loadings on betweenness for target and comparator nodes in Simulation 3

| Outcome                      | Predictor                    | <i>b</i> | <i>b</i>           |  | $\beta$ |
|------------------------------|------------------------------|----------|--------------------|--|---------|
|                              |                              |          | 95% CI<br>[LL, UL] |  |         |
| Target (y17) Betweenness     | Intercept                    | 54.26**  | [54.11, 54.42]     |  |         |
|                              | Target Factor 1 loading (f1) | -2.74**  | [-3.56, -1.92]     |  | -0.39   |
|                              | Target Factor 2 loading (f2) | -2.86**  | [-3.68, -2.04]     |  | -0.40   |
|                              | f1 x f2                      | 12.60**  | [8.21, 17.00]      |  | 0.33    |
| Comparator (y10) Betweenness | Intercept                    | 5.08**   | [4.94, 5.22]       |  |         |
|                              | Target Factor 1 loading (f1) | 0.56     | [-0.19, 1.30]      |  | 0.06    |
|                              | Target Factor 2 loading (f2) | -7.46**  | [-8.21, -6.71]     |  | -0.84   |
|                              | f1 x f2                      | -0.56    | [-4.57, 3.45]      |  | -0.01   |

*Note.* *b* represents unstandardized regression weights.  $\beta$  indicates the standardized regression weights. *LL* and *UL* indicate the lower and upper limits of a confidence interval, respectively. \*\* indicates  $p < .01$ .
